# Supplementary material for: Positive shift in corrole redox potentials leveraged by modest β-CF3-substitution helps achieve efficient photocatalytic C–H bond functionalization by group 13 complexes
Source: Royal Society of Chemistry journal article supplement (doi:10.1039/c9dt02150g), 2019-01-01
Supplement: c9dt02150g1.pdf [file c9dt02150g1.pdf]

# **Positive shift in corrole redox potentials leveraged by modest $\beta$ -CF<sub>3</sub>-substitution helps achieve efficient photocatalytic C-H bond functionalization for group 13 complexes**

Xuan Zhan <sup>a</sup>, Pinky Yadav <sup>a</sup>, Yael Diskin-Posner <sup>b</sup>, Natalia Fridman <sup>a</sup>, Mahesh Sundararajan <sup>c,d</sup>, Zakir Ullah <sup>c,d</sup>, Qiu-Cheng Chen <sup>a</sup>, Linda J. W. Shimon <sup>b</sup>, Atif Mahammed <sup>a</sup>, David G. Churchill <sup>\*a,c,d</sup> Mu-Hyun Baik<sup>\*c,d</sup> and Zeev Gross <sup>\*a</sup>

<sup>a</sup> Schulich Faculty of Chemistry, Technion-Israel Institute of Technology, Haifa 320000, Israel

<sup>b</sup> Department of Chemical Research Support, Weizmann Institute of Science, Rehovot, 76100, Israel

<sup>c</sup> Department of Chemistry, Korea Advanced Institute of Science and Technology (KAIST), Daejeon, Republic of Korea

<sup>d</sup> Center for Catalytic Hydrocarbon Functionalizations, Institute for Basic Science (IBS), Daejeon, Republic of Korea.

| <b>Table of contents</b> |                                                                                          | <b>Page<br/>number</b> |
|--------------------------|------------------------------------------------------------------------------------------|------------------------|
| Fig S1                   | The $^1\text{H}$ -NMR spectrum of <b>4CF<sub>3</sub>-Ga</b>                              | S5                     |
| Fig S2                   | The $^{19}\text{F}$ -NMR spectrum of <b>4CF<sub>3</sub>-Ga</b>                           | S5                     |
| Fig S3                   | The $^1\text{H}$ -NMR spectrum of <b>3CF<sub>3</sub>-Ga</b>                              | S6                     |
| Fig S4                   | The $^{19}\text{F}$ -NMR spectrum of <b>3CF<sub>3</sub>-Ga</b>                           | S6                     |
| Fig S5                   | The $^1\text{H}$ -NMR spectrum of <b>4CF<sub>3</sub>-Al</b>                              | S7                     |
| Fig S6                   | The $^{19}\text{F}$ -NMR spectrum of <b>4CF<sub>3</sub>-Al</b>                           | S7                     |
| Fig S7                   | The $^1\text{H}$ -NMR spectrum of <b>3CF<sub>3</sub>-Al</b>                              | S8                     |
| Fig S8                   | The $^{19}\text{F}$ -NMR spectrum of <b>3CF<sub>3</sub>-Al</b>                           | S8                     |
| Fig S9                   | The APCI mass spectrum of <b>4CF<sub>3</sub>-Ga</b>                                      | S9                     |
| Fig S10                  | The APCI mass spectrum of <b>3CF<sub>3</sub>-Ga</b>                                      | S10                    |
| Fig S11                  | The APCI mass spectrum of <b>4CF<sub>3</sub>-Al (negative mode)</b>                      | S11                    |
| Fig S12                  | The APCI mass spectrum of <b>4CF<sub>3</sub>-Al (positive mode)</b>                      | S12                    |
| Fig S13                  | The APCI mass spectrum of <b>3CF<sub>3</sub>-Al (negative mode)</b>                      | S13                    |
| Fig S14                  | The APCI mass spectrum of <b>3CF<sub>3</sub>-Al (positive mode)</b>                      | S14                    |
| Fig S15                  | CV traces of $-\text{CF}_3$ substituted compounds in reduction region                    | S15                    |
| Fig S16                  | $\text{H}_2\text{O}_2$ detection by UV-vis method                                        | S15                    |
| Table S1                 | Selected structural data for <b>3I-Al</b> , <b>3I-Ga</b> and <b>3CF<sub>3</sub>-Ga</b> . | S16                    |
| Table S2                 | Photophysical properties of investigated corrole complexes                               | S17                    |
| Table S3                 | Half wave redox potentials of investigated corroles                                      | S18                    |
| Table S4                 | The retention times of involved solvents by GC                                           | S19                    |

## Experimental section

**Materials:** Experimental reagents (Aldrich) and solvents were used without further purification. Silica gel 60 (230–400 mesh) was used for column chromatography.

### Synthetic Methods.

**Physical Methods:**  $^1\text{H}$  and  $^{19}\text{F}$  NMR spectra were recorded on a Bruker Avance III 400 spectrometer equipped with a 5 mm, automated tuning, and matching broad band probe (BBFO) with z-gradients. Chemical shifts are reported in ppm relative to the peak for residual hydrogen atoms of the deuterated solvent  $\text{CDCl}_3$  ( $\delta = 7.26$ ). Absorption spectra of the samples were measured on an Agilent 8454 spectrophotometer. Mass spectra for the compounds were performed on a Bruker Maxis Impact mass spectrometer, using APPI (atmospheric pressure photoionization) direct probe in either positive or negative mode.

**Spectroscopy:** Steady-state emission spectra were recorded on a Cary Eclipse fluorometer, at room temperature. Quantum yields (QY) of emission were calculated by using tetraphenylporphyrin (TPP) in toluene at room temperature ( $\Phi_F = 0.11$ ) as the standard. The fluorescence lifetimes were measured by the combined spectrometer consisting of the EDINBURGH LIFESPEC II and the picosecond pulsed diode laser. All samples were recorded in toluene at room temperature.

**Electrochemistry:** Cyclic voltammetry measurements were carried out in acetonitrile (HPLC grade) containing 0.5 mM of the group 13 element Al and Ga complexes and 0.1 M TBAP (Fluka, for electrochemical analysis) as the electrolyte under an argon atmosphere. A conventional three-electrode system consisting of a glassy carbon working electrode, a platinum wire as counter electrode, and silver wire separated from the bulk solution by a sample holder with a porous glass frit in 0.1 M TBAP / 0.01 M  $\text{AgNO}_3$  solution. Electrochemical measurements were recorded with an EmStat<sup>3+</sup> electrochemical system with a scan rate of  $100 \text{ mVs}^{-1}$ . All the potentials are referenced vs the  $\text{Fc}^+/\text{Fc}$  redox potential added as an internal standard ( $E_{1/2} = 0.0975 \text{ V}$  vs.  $\text{Ag}/\text{Ag}^+$  in 0.1 M TBAP / 0.01 M  $\text{AgNO}_3$  solution).

**Crystal Structure Determinations:** For crystal structure determination of **3I-Al**, data were collected at 100 K on a dual source Rigaku XtaLab PRO diffractometer equipped with PILATUS 200 detector, with [ $\lambda(\text{Cu-K}\alpha) = 1.54184 \text{ \AA}$ ] radiation. Structures were solved with SHELXT and further refined with full matrix least-squares based on  $F^2$  with SHELXL. Hydrogens were calculated in riding mode. For the crystal structural determination of **3CF3-Ga**, the data collection was performed using monochromated Mo  $\text{K}\alpha$  radiation,  $\lambda = 0.71073 \text{ \AA}$ , using  $\varphi$  and  $\omega$  scans to cover the Ewald sphere. Accurate cell parameters were obtained with the amount of indicated reflections. The structure was solved by direct methods (SHELXS-97) and refined by full matrix least-squares methods against  $F^2$  (SHELXL-97). All non-hydrogen atoms were refined with anisotropic displacement parameters. The hydrogen atoms were refined isotopically on calculated

positions using a riding model with their Uiso values constrained to 1.5 times the Ueq of their pivot atoms for terminal sp<sup>3</sup> carbon atoms and 1.2 times for all other carbon atoms.

### Photocatalysis

**HBr + phenol → *para*-monobrominated phenol + *ortho*-monobrominated phenol:** An acetonitrile solution (2.5 mL, with catalyst concentration that leads to OD = 2.0 at 400 nm) was charged with phenol (24 mg, 0.1 M) and aqueous 47% HBr (58 µL, 0.2 M) and placed in a 2.5 mL pyrex vial. The stirred solution was irradiated by a LED lamp with (200 W,  $\lambda_{\text{max}}$  = 395 - 405 nm, placed 15 cm from the vial) for 3 h. The internal temperature in the reaction solution was measured to be 36 °C. Prior to injection to the GC for product determination, the mixture was treated with solid K<sub>2</sub>CO<sub>3</sub> to neutralize the acid and into dry the solution and nitrobenzene (5µL, 49 µM) was added as an external reference. Identification of reaction products (see Table S4) and determination of their response factors relative to nitrobenzene was performed by authentic pure products that were either purchased or independently prepared. The retention times checked by the GC for acetonitrile, phenol, nitrobenzene, 2-bromophenol and 4-bromophenol were determined to elute at around 1.3 min, 3.8 min, 6.5 min, 5.8 min and 13.4 min, respectively.

**HBr + toluene → benzyl bromide:** An acetonitrile solution (2.5 mL, with catalyst concentration that leads to OD = 2.0 at 400 nm) was charged with toluene (108 µL, 0.4 M) and aqueous 47% HBr (116 µL, 0.4 M) and placed in a 2.5 mL vial made of Pyrex. The stirred solution was irradiated by a LED lamp with (200 W,  $\lambda_{\text{max}}$  = 395 - 405 nm, placed 15 cm from the vial) for 5 h. The internal temperature in the reaction solution was measured to be 36 °C. Prior to injection to the GC for product determination, the mixture was treated with solid K<sub>2</sub>CO<sub>3</sub> to neutralize the acid and to dry the solution; nitrobenzene (5 µL, 49 µM) was added as external reference. Identification of reaction products (see Table S4) and determination of their response factors relative to nitrobenzene were performed by using pure products that were either purchased or independently prepared. The retention times checked by the GC for acetonitrile, toluene, nitrobenzene and benzyl bromide were determined around 1.3 min, 1.8 min, 6.5 min and 6.8 min.

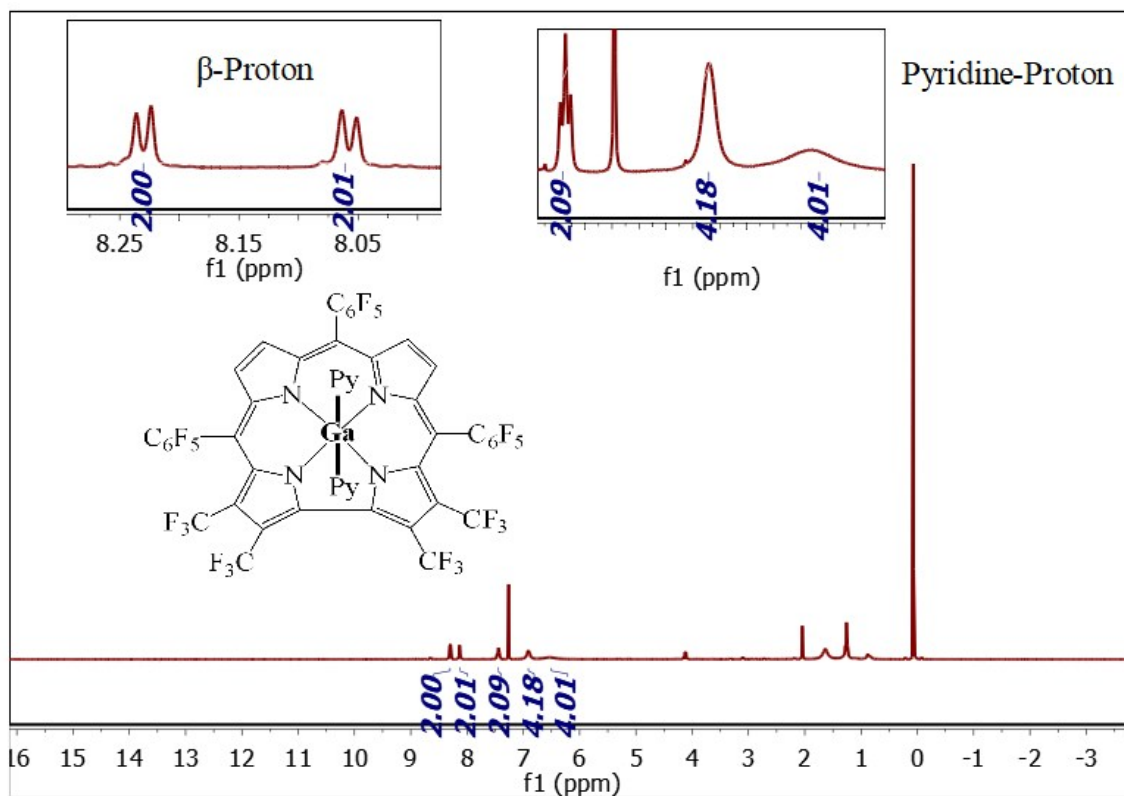

**Fig S1.** <sup>1</sup>H-NMR spectrum and expanded regions for compound **4CF<sub>3</sub>-Ga**.

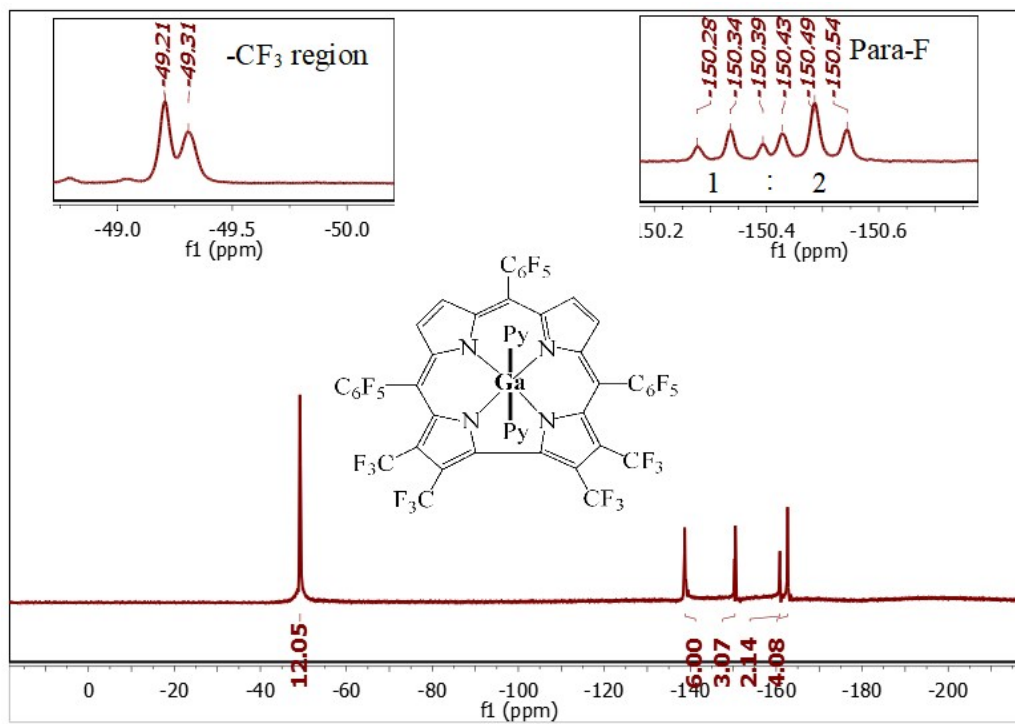

**Fig S2.** <sup>19</sup>F-NMR spectrum and expanded regions for compound **4CF<sub>3</sub>-Ga**.

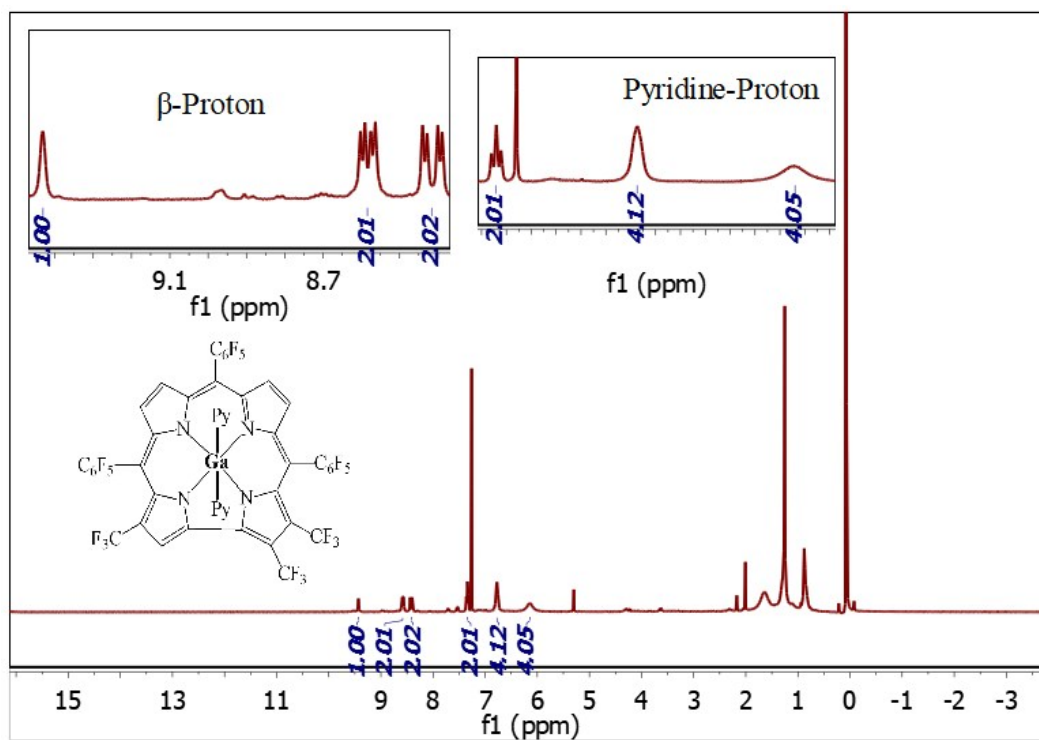

**Fig S3.**  $^1\text{H}$ -NMR spectrum and expanded regions for compound  $3\text{CF}_3\text{-Ga}$ .

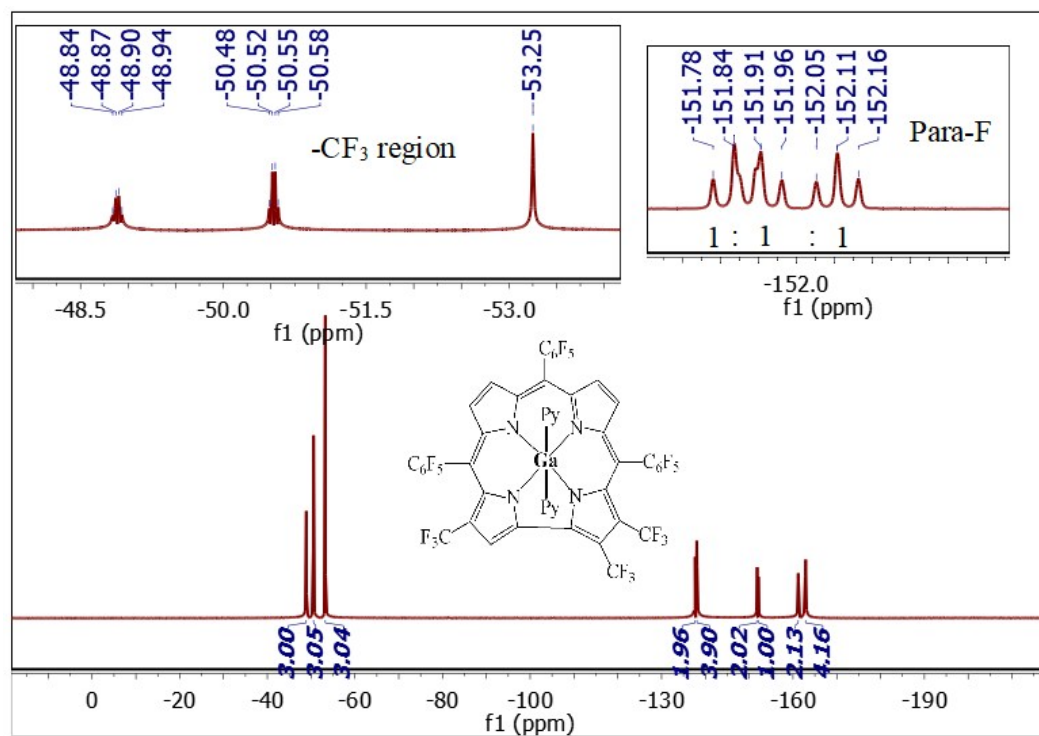

**Fig S4.**  $^{19}\text{F}$ -NMR spectrum and expanded regions for compound  $3\text{CF}_3\text{-Ga}$ .

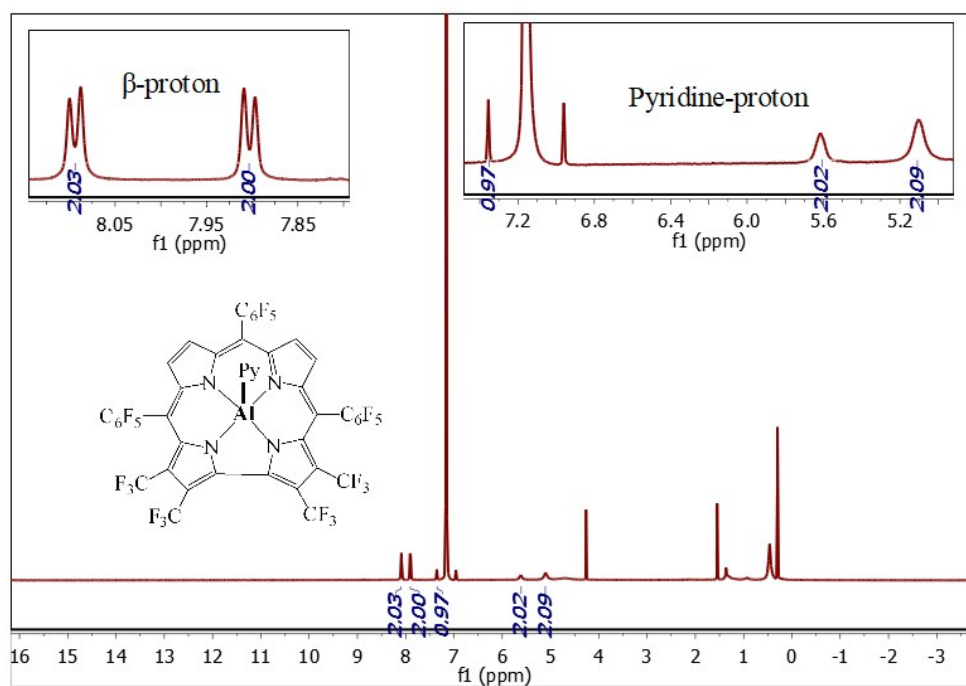

**Fig S5.**  $^1\text{H}$ -NMR spectrum and expanded regions for compound **4CF<sub>3</sub>-Al**.

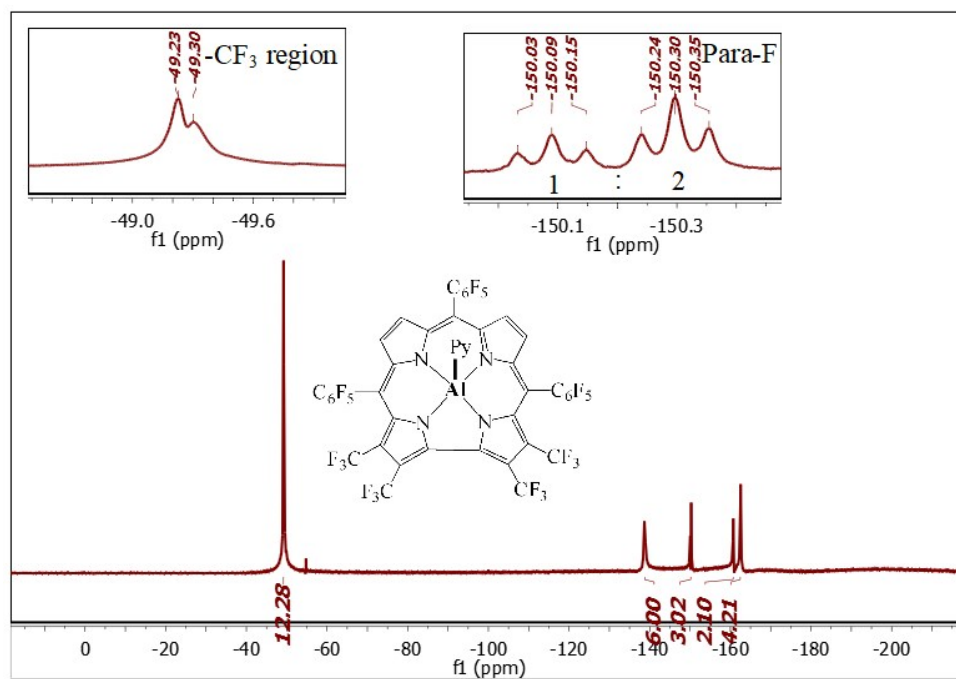

**Fig S6.**  $^{19}\text{F}$ -NMR spectrum and expanded regions for compound **4CF<sub>3</sub>-Al**.

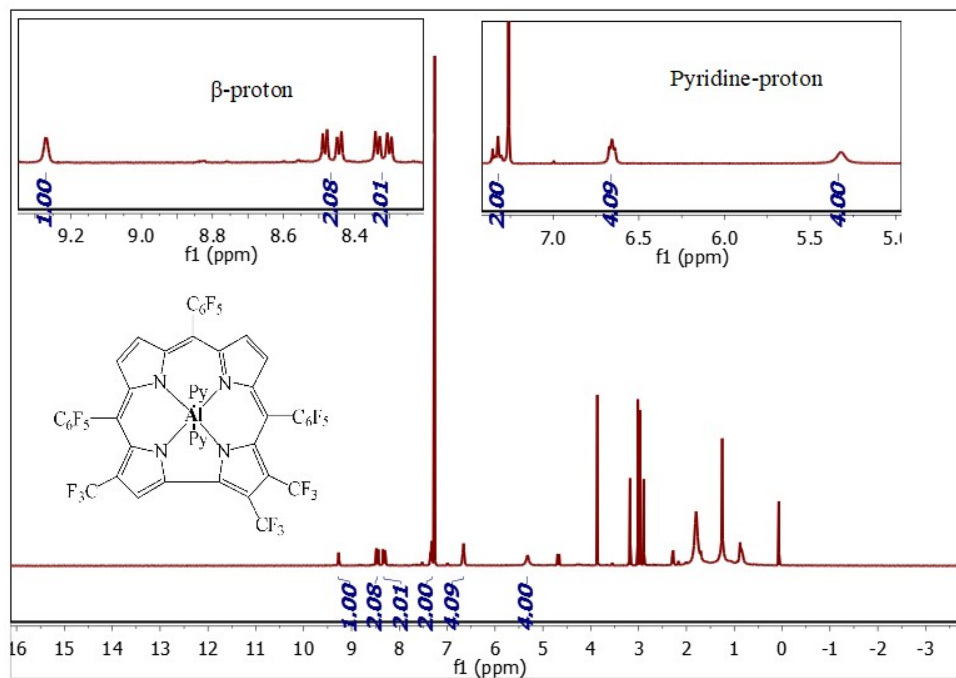

**Fig S7.** <sup>1</sup>H-NMR spectrum and expanded regions for compound **3CF<sub>3</sub>-Al**.

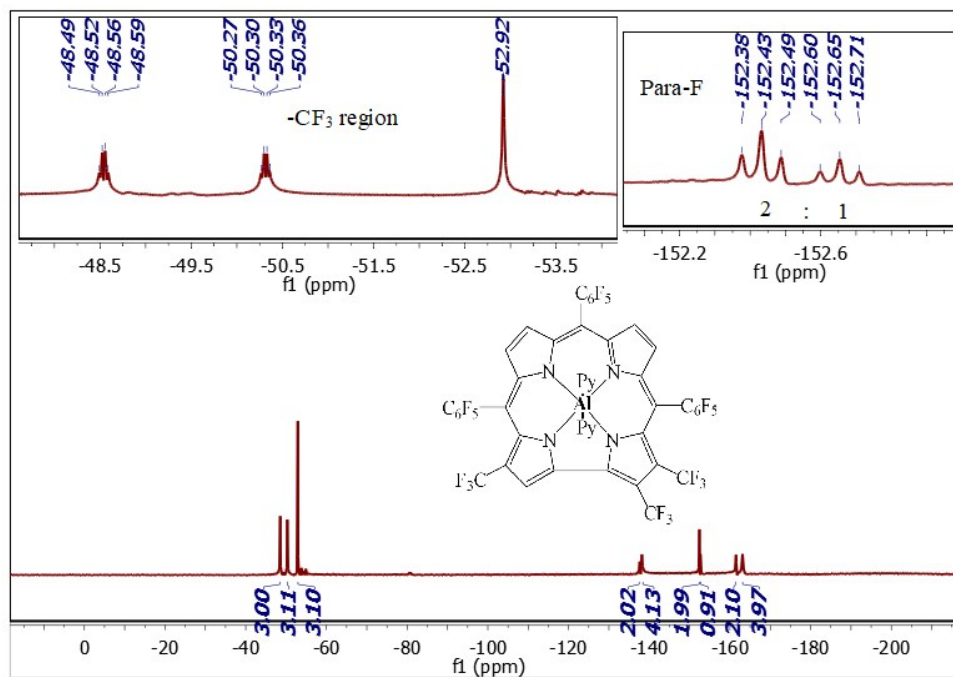

**Fig S8.** <sup>19</sup>F-NMR spectrum and expanded regions for compound **3CF<sub>3</sub>-Al**.

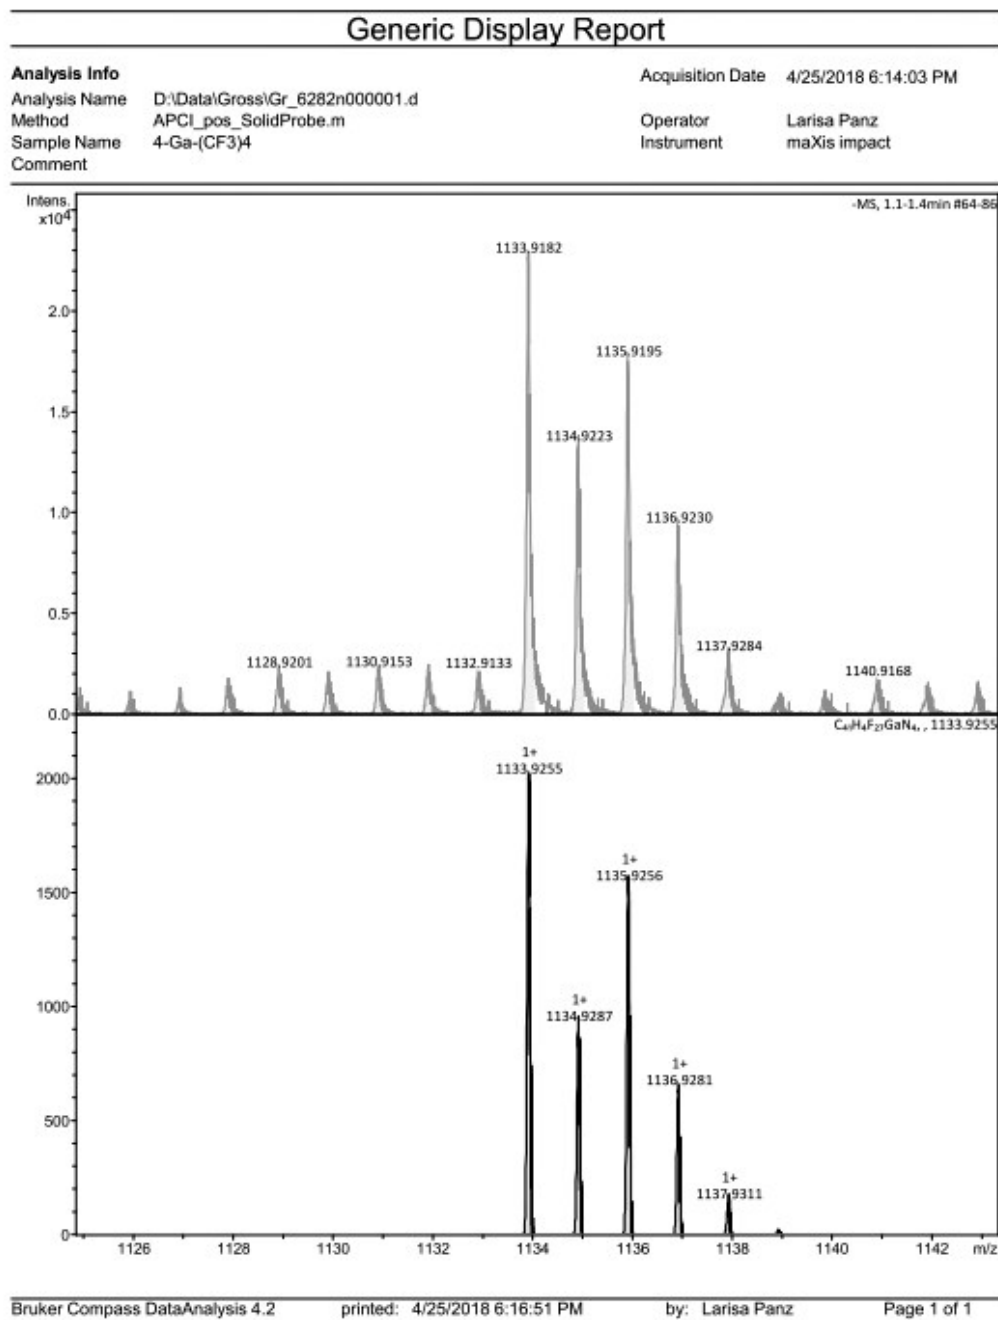

**Fig S9.** APCI mass spectral data for compound **4CF<sub>3</sub>-Ga**.

## Generic Display Report

### Analysis Info

Analysis Name D:\Data\Gross\Gr\_6283n000001.d  
Method APCI\_pos\_SolidProbe.m  
Sample Name 3-Ga-(CF<sub>3</sub>)<sub>3</sub>  
Comment

Acquisition Date 4/25/2018 5:59:51 PM

Operator Larisa Panz  
Instrument maXis impact

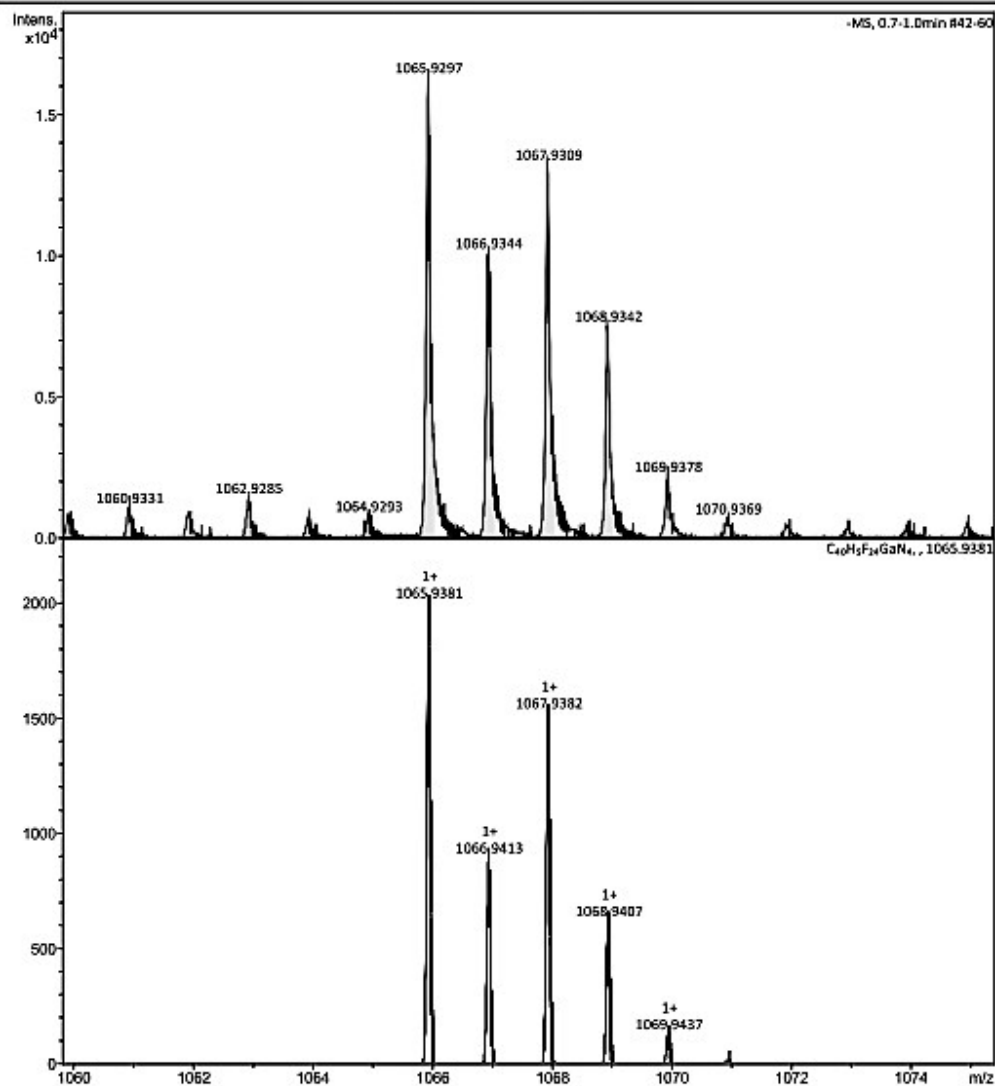

Fig S10. APCI mass spectral data for compound 3CF<sub>3</sub>-Ga.

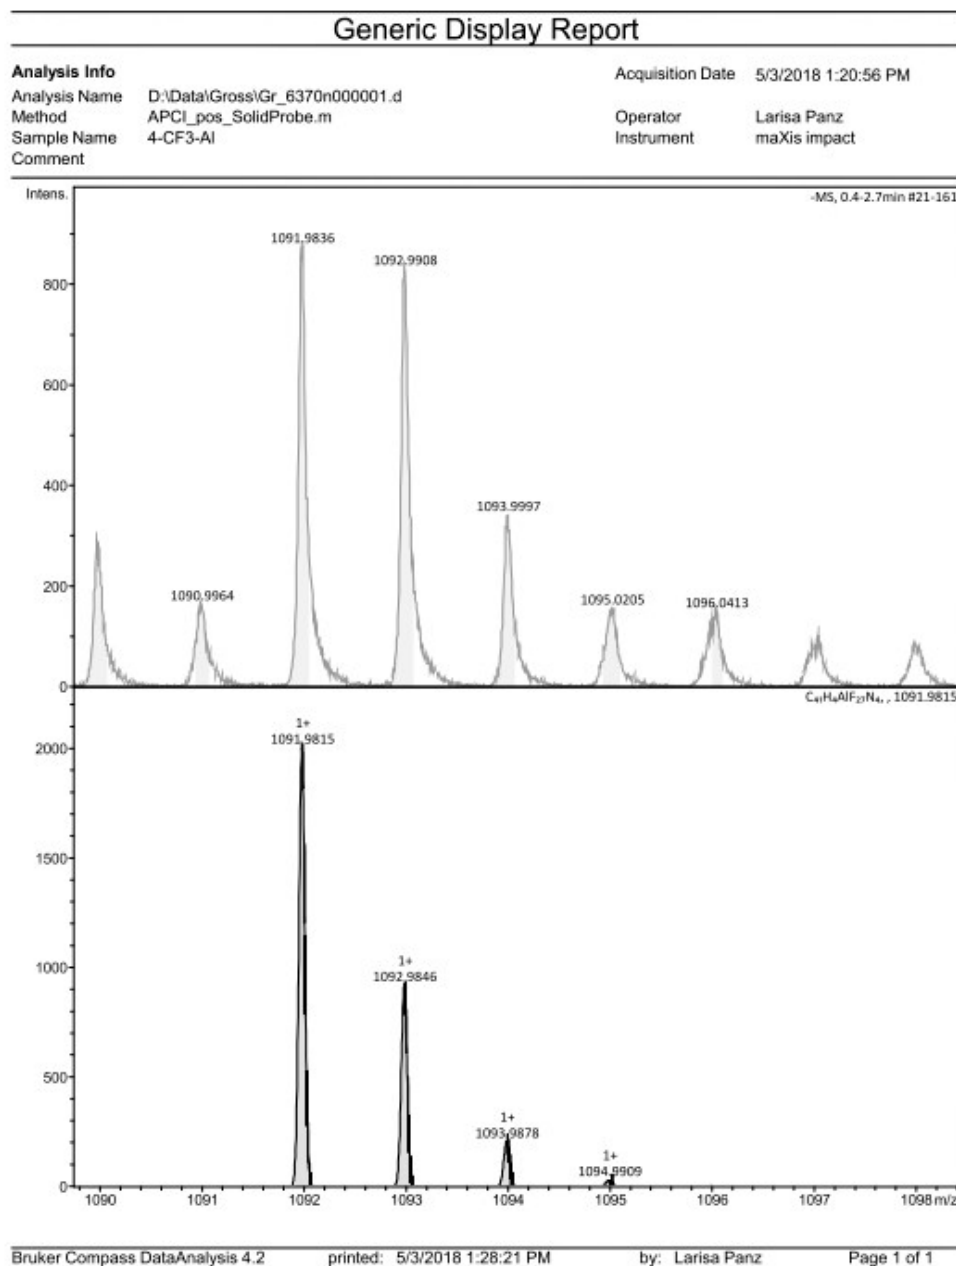

**Fig S11.** APCI mass spectral data for compound **4CF<sub>3</sub>-Al** (negative mode).



| Compound Spectrum SmartFormula Report |                                |                      |                                       |                  |           |
|---------------------------------------|--------------------------------|----------------------|---------------------------------------|------------------|-----------|
| Analysis Info                         |                                |                      | Acquisition Date 4/25/2018 5:50:39 PM |                  |           |
| Analysis Name                         | D:\Data\Gross\Gr_6285n000001.d |                      | Operator                              | Larisa Panz      |           |
| Method                                | APCI_pos_SolidProbe.m          |                      | Instrument                            | maXis impact     |           |
| Sample Name                           | 3-Al-(CF3)3                    |                      |                                       | 282001.00128     |           |
| Comment                               |                                |                      |                                       |                  |           |
| Acquisition Parameter                 |                                |                      |                                       |                  |           |
| Source Type                           | APCI                           | Ion Polarity         | Negative                              | Set Nebulizer    | 1.2 Bar   |
| Focus                                 | Active                         | Set Capillary        | 4000 V                                | Set Dry Heater   | 120 °C    |
| Scan Begin                            | 50 m/z                         | Set End Plate Offset | -500 V                                | Set Dry Gas      | 1.5 l/min |
| Scan End                              | 2500 m/z                       | Set Charging Voltage | 2000 V                                | Set Divert Valve | Source    |
|                                       |                                | Set Corona           | 2000 nA                               | Set APCI Heater  | 300 °C    |

-MS, 0.4-0.6min #20-36

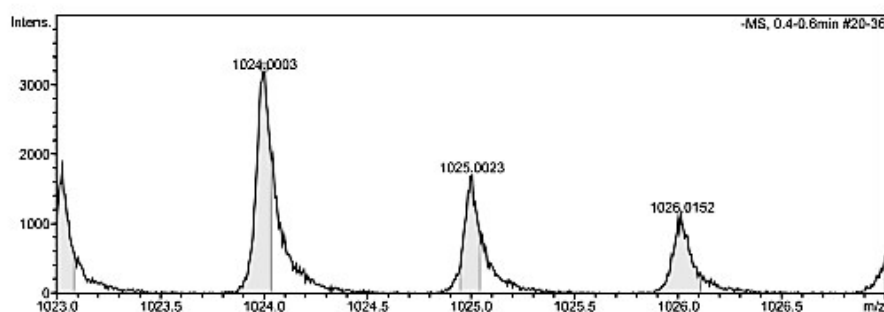

| Meas. m/z | # | Ion Formula  | m/z       | err [ppm] | mSigma | # mSigma | Score  | rdB  | e <sup>-</sup> Conf | N-Rule | err  [mDa] |
|-----------|---|--------------|-----------|-----------|--------|----------|--------|------|---------------------|--------|------------|
| 1024.0003 | 1 | C40H4AlF24N4 | 1022.9868 | -10.1     | 447.0  | 1        | 100.00 | 29.5 | even                | ok     | 10.3       |
|           | 2 | C40H2AlF24N4 | 1020.9712 | -19.3     | 697.9  | 2        | 0.00   | 30.5 | even                | ok     | 19.7       |

**Fig S13.** APCI mass spectral data for compound **3CF<sub>3</sub>-Al** (negative mode).

## Compound Spectrum SmartFormula Report

### Analysis Info

Analysis Name D:\Data\Gross\Gr\_6285000001.d  
 Method APCI\_pos\_SolidProbe.m  
 Sample Name 3-Al-CF3  
 Comment

Acquisition Date 4/24/2018 12:00:00 PM  
 Operator Larisa Panz  
 Instrument maXis impact 282001.00128

### Acquisition Parameter

|             |          |                      |          |                  |           |
|-------------|----------|----------------------|----------|------------------|-----------|
| Source Type | APCI     | Ion Polarity         | Positive | Set Nebulizer    | 1.2 Bar   |
| Focus       | Active   | Set Capillary        | 3000 V   | Set Dry Heater   | 120 °C    |
| Scan Begin  | 50 m/z   | Set End Plate Offset | -500 V   | Set Dry Gas      | 1.5 l/min |
| Scan End    | 2500 m/z | Set Charging Voltage | 2000 V   | Set Divert Valve | Source    |
|             |          | Set Corona           | 5000 nA  | Set APCI Heater  | 300 °C    |

+MS, 0.5-0.7min #28-42

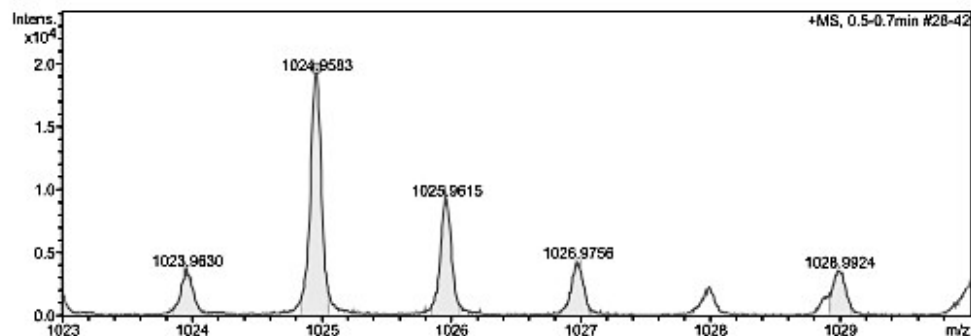

| Meas. m/z | # | Ion Formula    | m/z       | err [ppm] | mSigma | # mSigma | Score  | rdB  | c <sup>-</sup> | Conf | N-Rule | err  [mDa] |
|-----------|---|----------------|-----------|-----------|--------|----------|--------|------|----------------|------|--------|------------|
| 1024.9583 | 1 | C40H16AlF24N4  | 1025.0019 | 42.5      | 66.0   | 1        | 0.00   | 28.5 | even           |      | ok     | 43.6       |
|           | 2 | C36H6AlF24N4O3 | 1024.9867 | 27.7      | 79.0   | 2        | 100.00 | 24.5 | even           |      | ok     | 28.3       |

Gr\_6285000001.d

Bruker Compass DataAnalysis 4.2

printed: 4/24/2018 12:06:23 PM

by: Larisa Panz

Page 1 of 1

**Fig S14.** APCI mass spectral data for compound **3CF<sub>3</sub>-Al** (positive mode).

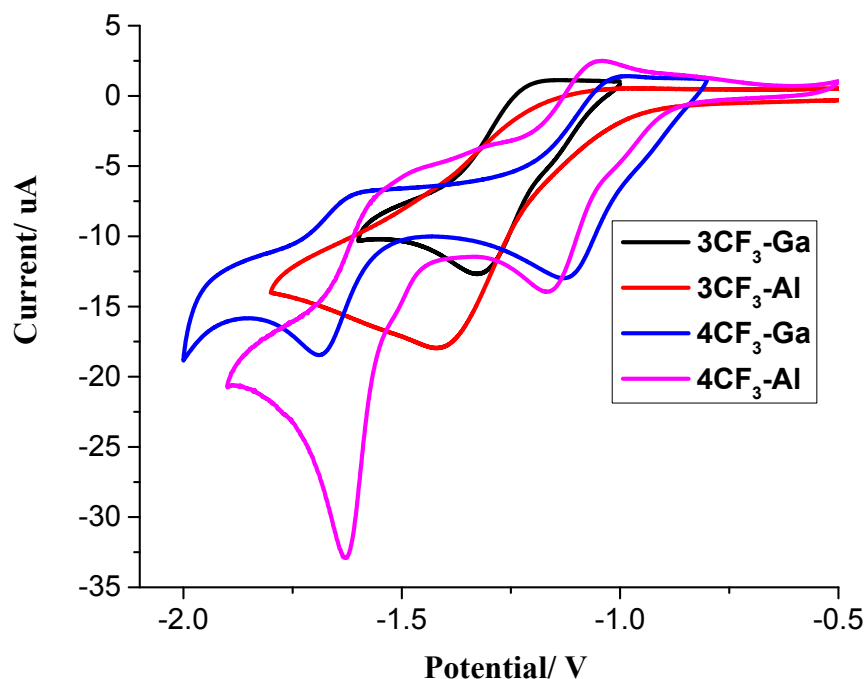

**Fig S15.** CV traces in the reduction region for all  $-\text{CF}_3$  substituted compounds studied herein (room temperature, argon atmosphere, glassy carbon working electrode, ferrocene standard,  $100 \text{ mVs}^{-1}$  scan rate, 0.5 mm complex, 0.1 M TBAP, in  $\text{CH}_3\text{CN}$ , V vs  $\text{Ag}/\text{AgNO}_3$ ).

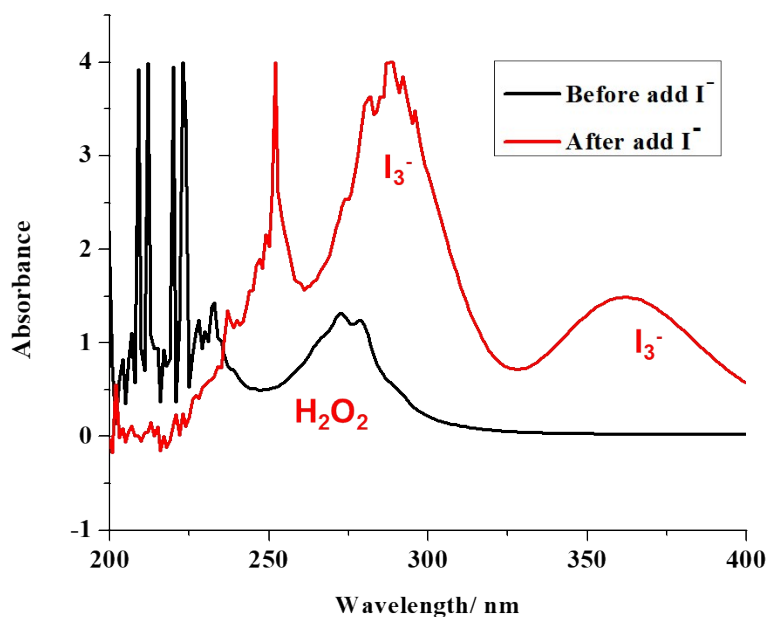

**Fig S16.** The UV-vis spectra of a reaction mixture ( $3\text{CF}_3\text{-Ga}$  ( $25 \mu\text{M}$ ) +  $58 \mu\text{L}$   $\text{HBr}$  ( $0.2 \text{ M}$ ) +  $24 \text{ mg}$  phenol ( $0.1 \text{ M}$ ) in  $2.5 \text{ mL}$   $\text{MeCN}$ , after irradiation ( $400 \text{ nm}$ ) for  $2 \text{ h}$ ) before and after adding excess TBAI (tetrabutylammonium iodide).

| Complex                   | Ga deviation [Å]<br>from the N4<br>corrole plane | Ga-pyridine<br>bond length<br>[Å] | Ga-N(pyrrole)bond<br>length ranges [Å] | Table<br>S1.<br>Select<br>ed<br>struct<br>ural<br>data<br>for<br>comp<br>ounds<br><b>3I-Al</b> ,<br><b>3I-Ga</b><br>and<br><b>3CF<sub>3</sub>-Ga</b> . |
|---------------------------|--------------------------------------------------|-----------------------------------|----------------------------------------|--------------------------------------------------------------------------------------------------------------------------------------------------------|
| <b>3I-Al</b>              | 0.00025                                          | 2.153, 2.155                      | 1.895-1.904                            |                                                                                                                                                        |
| <b>3I-Ga</b>              | 0.018                                            | 2.292,<br>2.230                   | 1.912-1.952                            |                                                                                                                                                        |
| <b>3CF<sub>3</sub>-Ga</b> | 0.023                                            | -                                 | 1.918-1.971                            |                                                                                                                                                        |

**Table S2.** Photophysical properties of investigated corrole complexes recorded in toluene.

| <b>Complex</b>            | <b>Soret band (nm)</b><br><b>(<math>\epsilon</math>, <math>10^4</math>)</b> | <b>Q band (nm)</b><br><b>(<math>\epsilon</math>, <math>10^4</math>)</b> | <b><math>\lambda_{em}</math></b><br><b>(nm)</b> | <b><math>\Phi_f</math></b> | <b><math>\tau</math> (ns)</b> | <b>Kr</b><br><b>(<math>10^8</math> S<sup>-1</sup>)</b> | <b>Knr</b><br><b>(<math>10^8</math> S<sup>-1</sup>)</b> |
|---------------------------|-----------------------------------------------------------------------------|-------------------------------------------------------------------------|-------------------------------------------------|----------------------------|-------------------------------|--------------------------------------------------------|---------------------------------------------------------|
| <b>1-Ga</b>               | 402<br>424 (28.3)                                                           | 571<br>597 (2.4)                                                        | 602<br>657                                      | 0.28                       | 2.61                          | 1.07                                                   | 2.75                                                    |
| <b>1-Al</b>               | 401<br>422 (29.4)                                                           | 572<br>593                                                              | 627<br>689                                      | 0.76                       | 6.32                          | 1.20                                                   | 0.38                                                    |
| <b>3CF<sub>3</sub>-Ga</b> | 405(2.96), 427 (7.16)                                                       | 590(1.479),<br>615 (2.024)                                              | 623,<br>677                                     | 0.57                       | 2.49                          | 2.29                                                   | 1.73                                                    |
| <b>3CF<sub>3</sub>-Al</b> | 403(2.98), 424 (7.77)                                                       | 590 (1.808),<br>612 (2.203)                                             | 618,<br>672                                     | 0.71                       | 3.30                          | 2.37                                                   | 0.88                                                    |
| <b>4CF<sub>3</sub>-Ga</b> | 360 (1.66),<br>416(4.67), 430 (6.36)                                        | 574(1.559),<br>596(2.033),<br>627 (3.386)                               | 634,<br>689                                     | 0.55                       | 4.54                          | 1.21                                                   | 4.02                                                    |
| <b>4CF<sub>3</sub>-Al</b> | 360(1.36), 426 (4.21)                                                       | 572 (1.08),<br>595 (1.56),<br>620 (2.26)                                | 635,<br>687                                     | 0.66                       | 4.58                          | 1.44                                                   | 0.74                                                    |

**Table S3.** Half wave redox potentials of investigated corroles.

| <b>Complex</b>            | <b>1<sup>st</sup> oxidation<br/>(V)</b> | <b>reduction<br/>(V)</b> | <b><math>\Delta E^a</math><br/>(V)</b> |
|---------------------------|-----------------------------------------|--------------------------|----------------------------------------|
| <b>1-Ga</b>               | 0.37                                    | -                        | -                                      |
| <b>3CF<sub>3</sub>-Ga</b> | 0.77                                    | -1.26                    | 2.02                                   |
| <b>4CF<sub>3</sub>-Ga</b> | 0.83                                    | -1.07, -1.64             | 1.90                                   |
| <b>1-Al</b>               | 0.23                                    | -                        | -                                      |
| <b>3CF<sub>3</sub>-Al</b> | 0.62                                    | -1.24                    | 1.87                                   |
| <b>4CF<sub>3</sub>-Al</b> | 0.74                                    | -1.11, -1.59             | 1.85                                   |

**Table S4.** Retention times of involved solvents recorded by our GC.

| <b>Solvent</b> | <b>Retention time in GC (min)</b> |
|----------------|-----------------------------------|
| Acetonitrile   | ~1.3                              |
| Benzaldehyde   | ~3.4                              |
| Phenol         | ~3.8                              |
| Nitrobenzene   | ~6.5                              |
| 2-bromophenol  | ~5.8                              |
| 4-bromophenol  | ~13.4                             |
| Benzyl bromide | ~6.8                              |

***END OF SUPPORTING INFORMATION***
